# Supplementary material for: Capture and Detection of Extracellular Vesicles Derived from Human Breast Cancer Cells Using a 3D Self-Assembled Nanostructured SiO2 Microfluidic Chip.
Source: Research Square preprint supplement (doi:10.21203/rs.3.rs-5611511/v1), 2025-03-27
Supplement: Supplementary file 1 [file 14ddb5d765c513a7d35a87b5.docx]

**Supporting Information**

**Capture and Detection of Extracellular Vesicles Derived from Human Breast Cancer Cells Using a 3D Self-Assembled Nanostructured SiO2 Microfluidic Chip**

Carolina Cabeza1*, Felipe Rojas2*, Lorena Lobos-González3,4, Dominique Lemaitre1, Juan Villena5, María Luisa Cordero6, Natalia Hassan2,​7,8+​ and Rina Ortiz9+.

**Supplementary Table 1:** Hydrodynamic diameter of silica nanoparticles obtained by DLS at different volume of TEOS.

| **TEOS (mL)** | **Dh (nm)** | **SD** |
| --- | --- | --- |
| 0,77 | 295,3 | 6,2 |
| 1,54 | 365,2 | 8,4 |
| 2,31 | 399,9 | 7,2 |

**Supplementary Table 2:** Physicochemical characterization of silica nanoparticles by DLS and Zeta potential. n=3.

| **Dh (nm)** | **SD** | **PDI** | **Zeta Potential (mV)** | **SD** |
| --- | --- | --- | --- | --- |
| 317,3 | 70,8 | 0,032 | -50,6 | 6,5 |


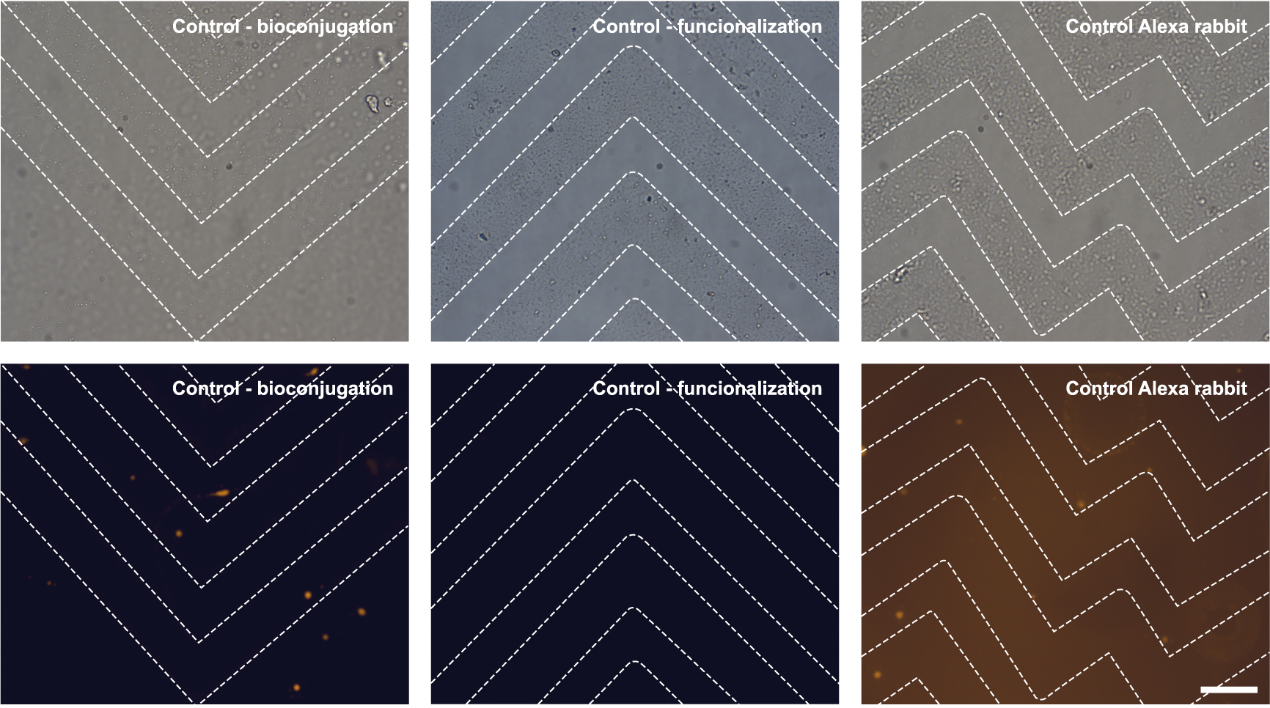


**Supplementary Figure S1. Fluorescence images of negative controls for extracellular vesicles (EVs) immunocapture, demonstrating the specificity of detection.** Negative controls were performed to ensure that the fluorescence signal observed during EV immunodetection was specific. Each condition is shown with two images: a bright-field image and a red fluorescence image. The first negative control (left panel) corresponds to the experiment in which the nanostructure lacked the primary monoclonal anti-CD81 antibody on the nanostructure surface (Control – bioconjugation). The second negative control (middle panel) corresponds to the experiment in which the SiO₂-NP were not functionalized with protein A (Control – functionalization). And the third negative control (right panel) corresponds to the experiment which used an Alexa-555 antibody from a different species (rabbit) was used, instead of the monoclonal antibody (mouse) employed for EV detection (demonstrating the specificity of the fluorescent labelling associated with the anti-CD63 monoclonal antibody). Scale bar 25 µm.


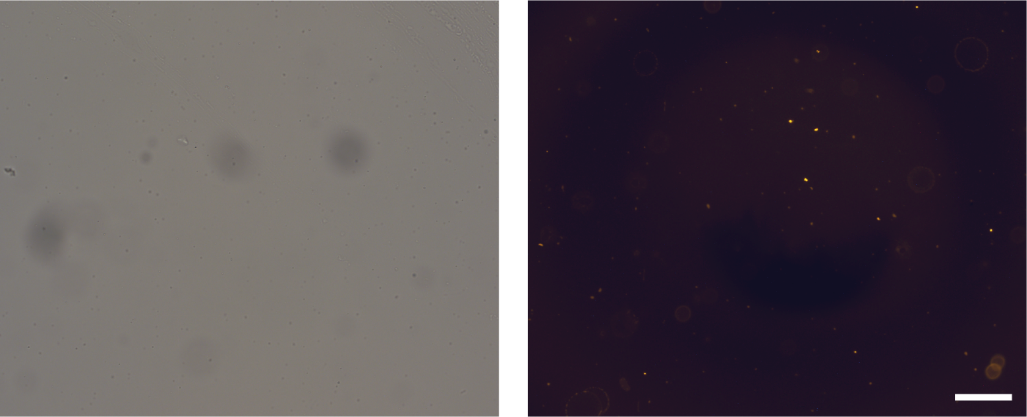


**Supplementary Figure S2. Fluorescence images of immunocapture and detection of extracellular vesicles (EVs) on a flat surface.** A bright-field image (left) and a red fluorescence image (right) from an experiment performed on a silanized glass coverslip lacking the SiO₂-NP nanostructure. The silanized glass was functionalized with APTES and subsequently incubated with anti-CD63-conjugated nanoparticles. EV samples were derived from the MDA-MB-231 cell line. Immunofluorescence detection was then performed using a monoclonal anti-CD81 antibody and an Alexa 555-conjugated anti-mouse secondary antibody. Scale bar: 50 μm.

**
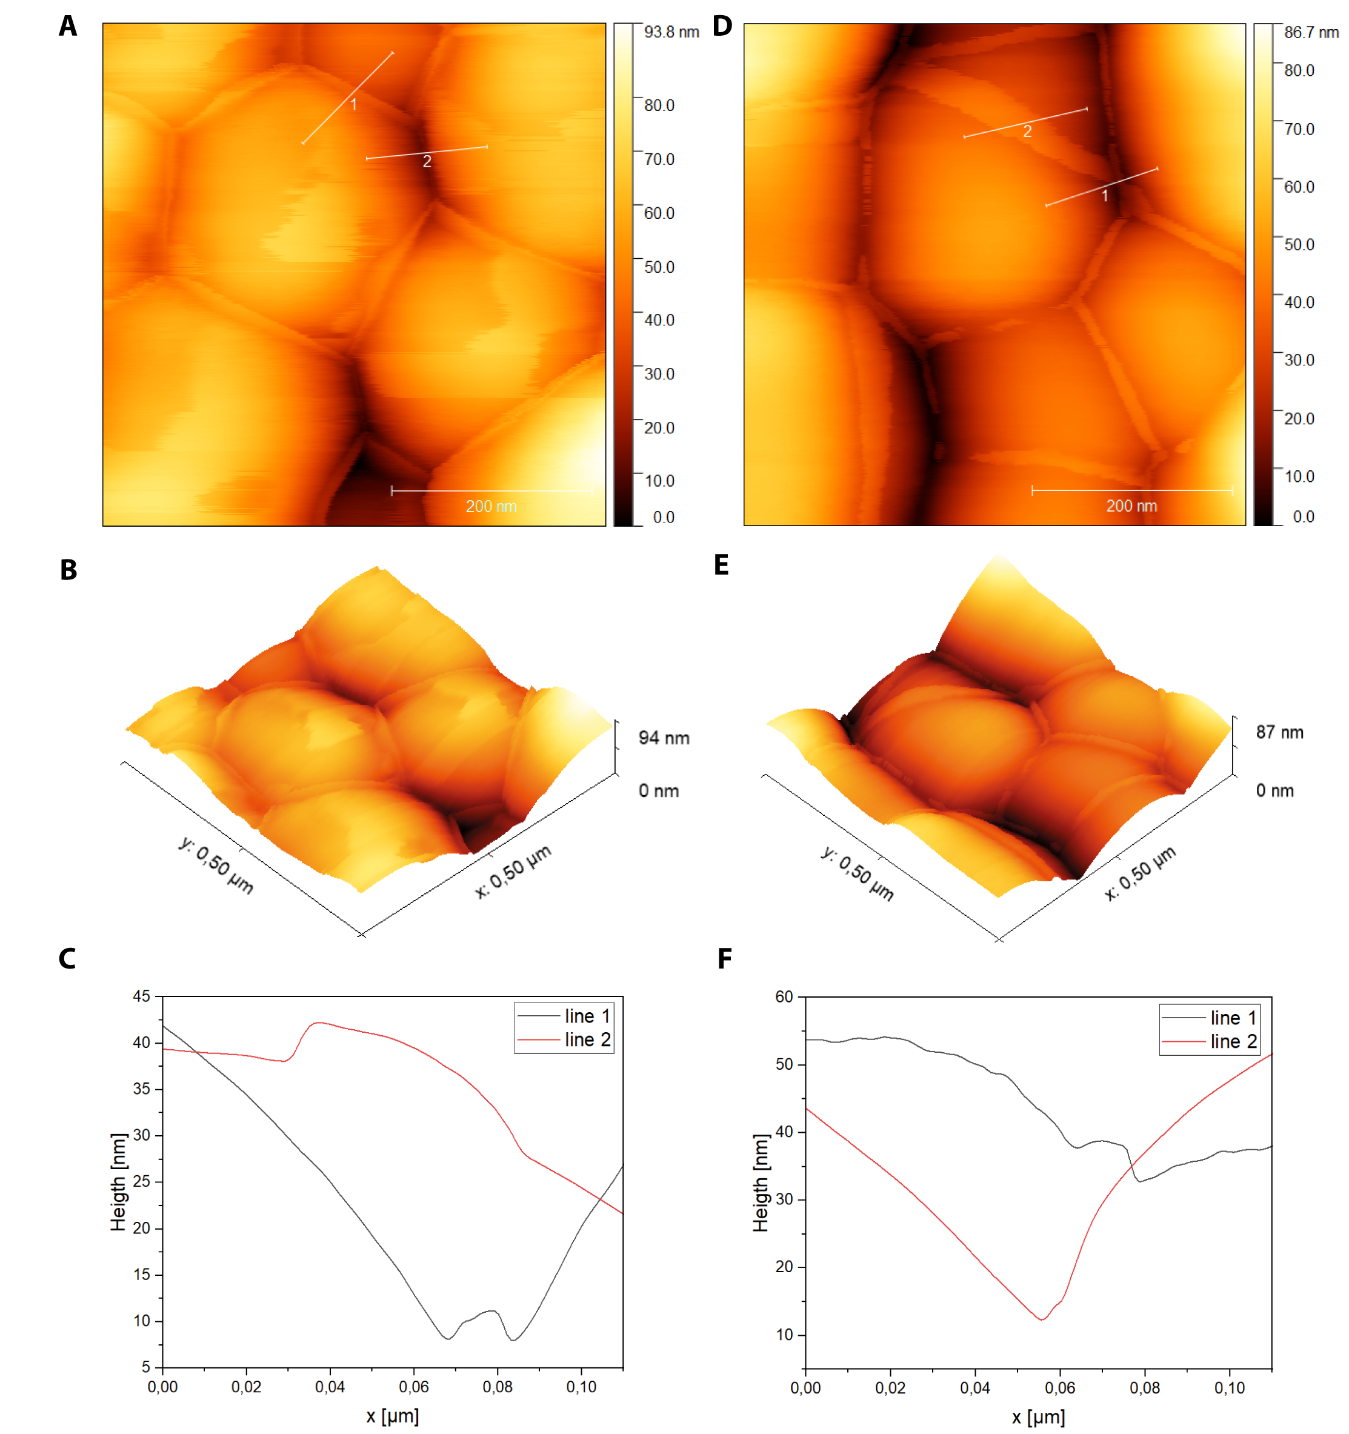
**

**Supplementary Figure S3. AFM images illustrating the morphology and capture efficiency of silica nanoparticles. (A)** Silica nanoparticles without EVs, showing a uniform surface and well-defined particle boundaries; **(B)** 3D AFM image of (A) and **(C)** Surface roughness and structural variations of (A). **(D)** Silica nanoparticles with captured EVs; **(E)** 3D AFM image of (D) and **(F)** Surface roughness and structural variations of (D).
