# Supplementary material for: Capture and Detection of Extracellular Vesicles Derived from Human Breast Cancer Cells Using a 3D Self-Assembled Nanostructured SiO2 Microfluidic Chip.
Source: Research Square preprint supplement (doi:10.21203/rs.3.rs-5611511/v1), 2025-03-27
Supplement: Supplementary file 2 [file ff4a97ee98b2c2d99923733a.docx]

**Supporting Information**

**Capture and Detection of Extracellular Vesicles Derived from Human Breast Cancer Cells Using a 3D Self-Assembled Nanostructured SiO2 Microfluidic Chip**

Carolina Cabeza1,2*, Felipe ​​Rojas3*, Lorena Lobos-González4,5, Dominique Lemaitre6, Juan Villena7, María Luisa Cordero8, Natalia Hassan3,​9,10+​ and Rina Ortiz11+.

**Table Supplementary 1:** Hydrodynamic diameter of silica nanoparticles obtained by DLS at different volume of TEOS.

| **TEOS (mL)** | **Dh (nm)** | **SD** |
| --- | --- | --- |
| 0,77 | 295,3 | 6,2 |
| 1,54 | 365,2 | 8,4 |
| 2,31 | 399,9 | 7,2 |

**Table Supplementary 2:** Physicochemical characterization of silica nanoparticles by DLS and Zeta potential. n=3.

| **Dh (nm)** | **SD** | **PDI** | **Zeta Potential (mV)** | **SD** |
| --- | --- | --- | --- | --- |
| 317,3 | 70,8 | 0,032 | -50,6 | 6,5 |


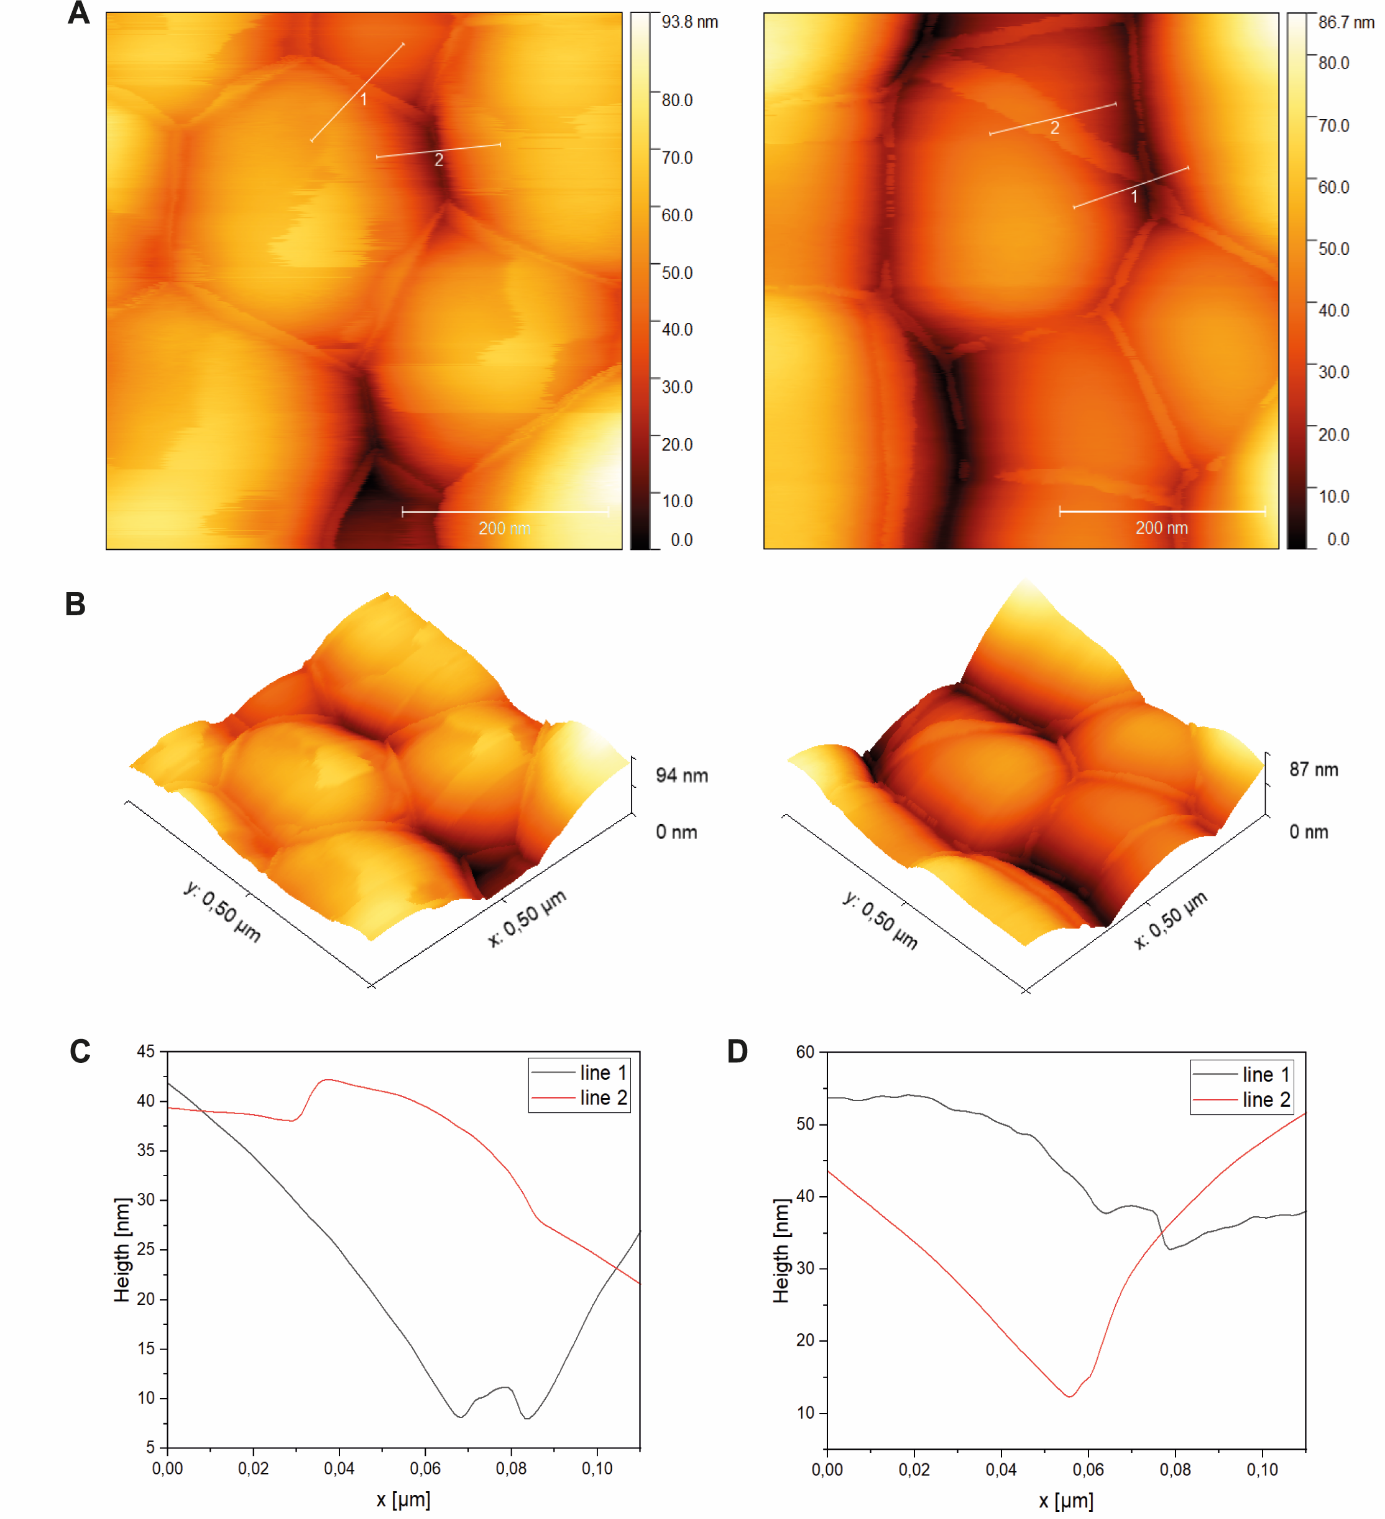

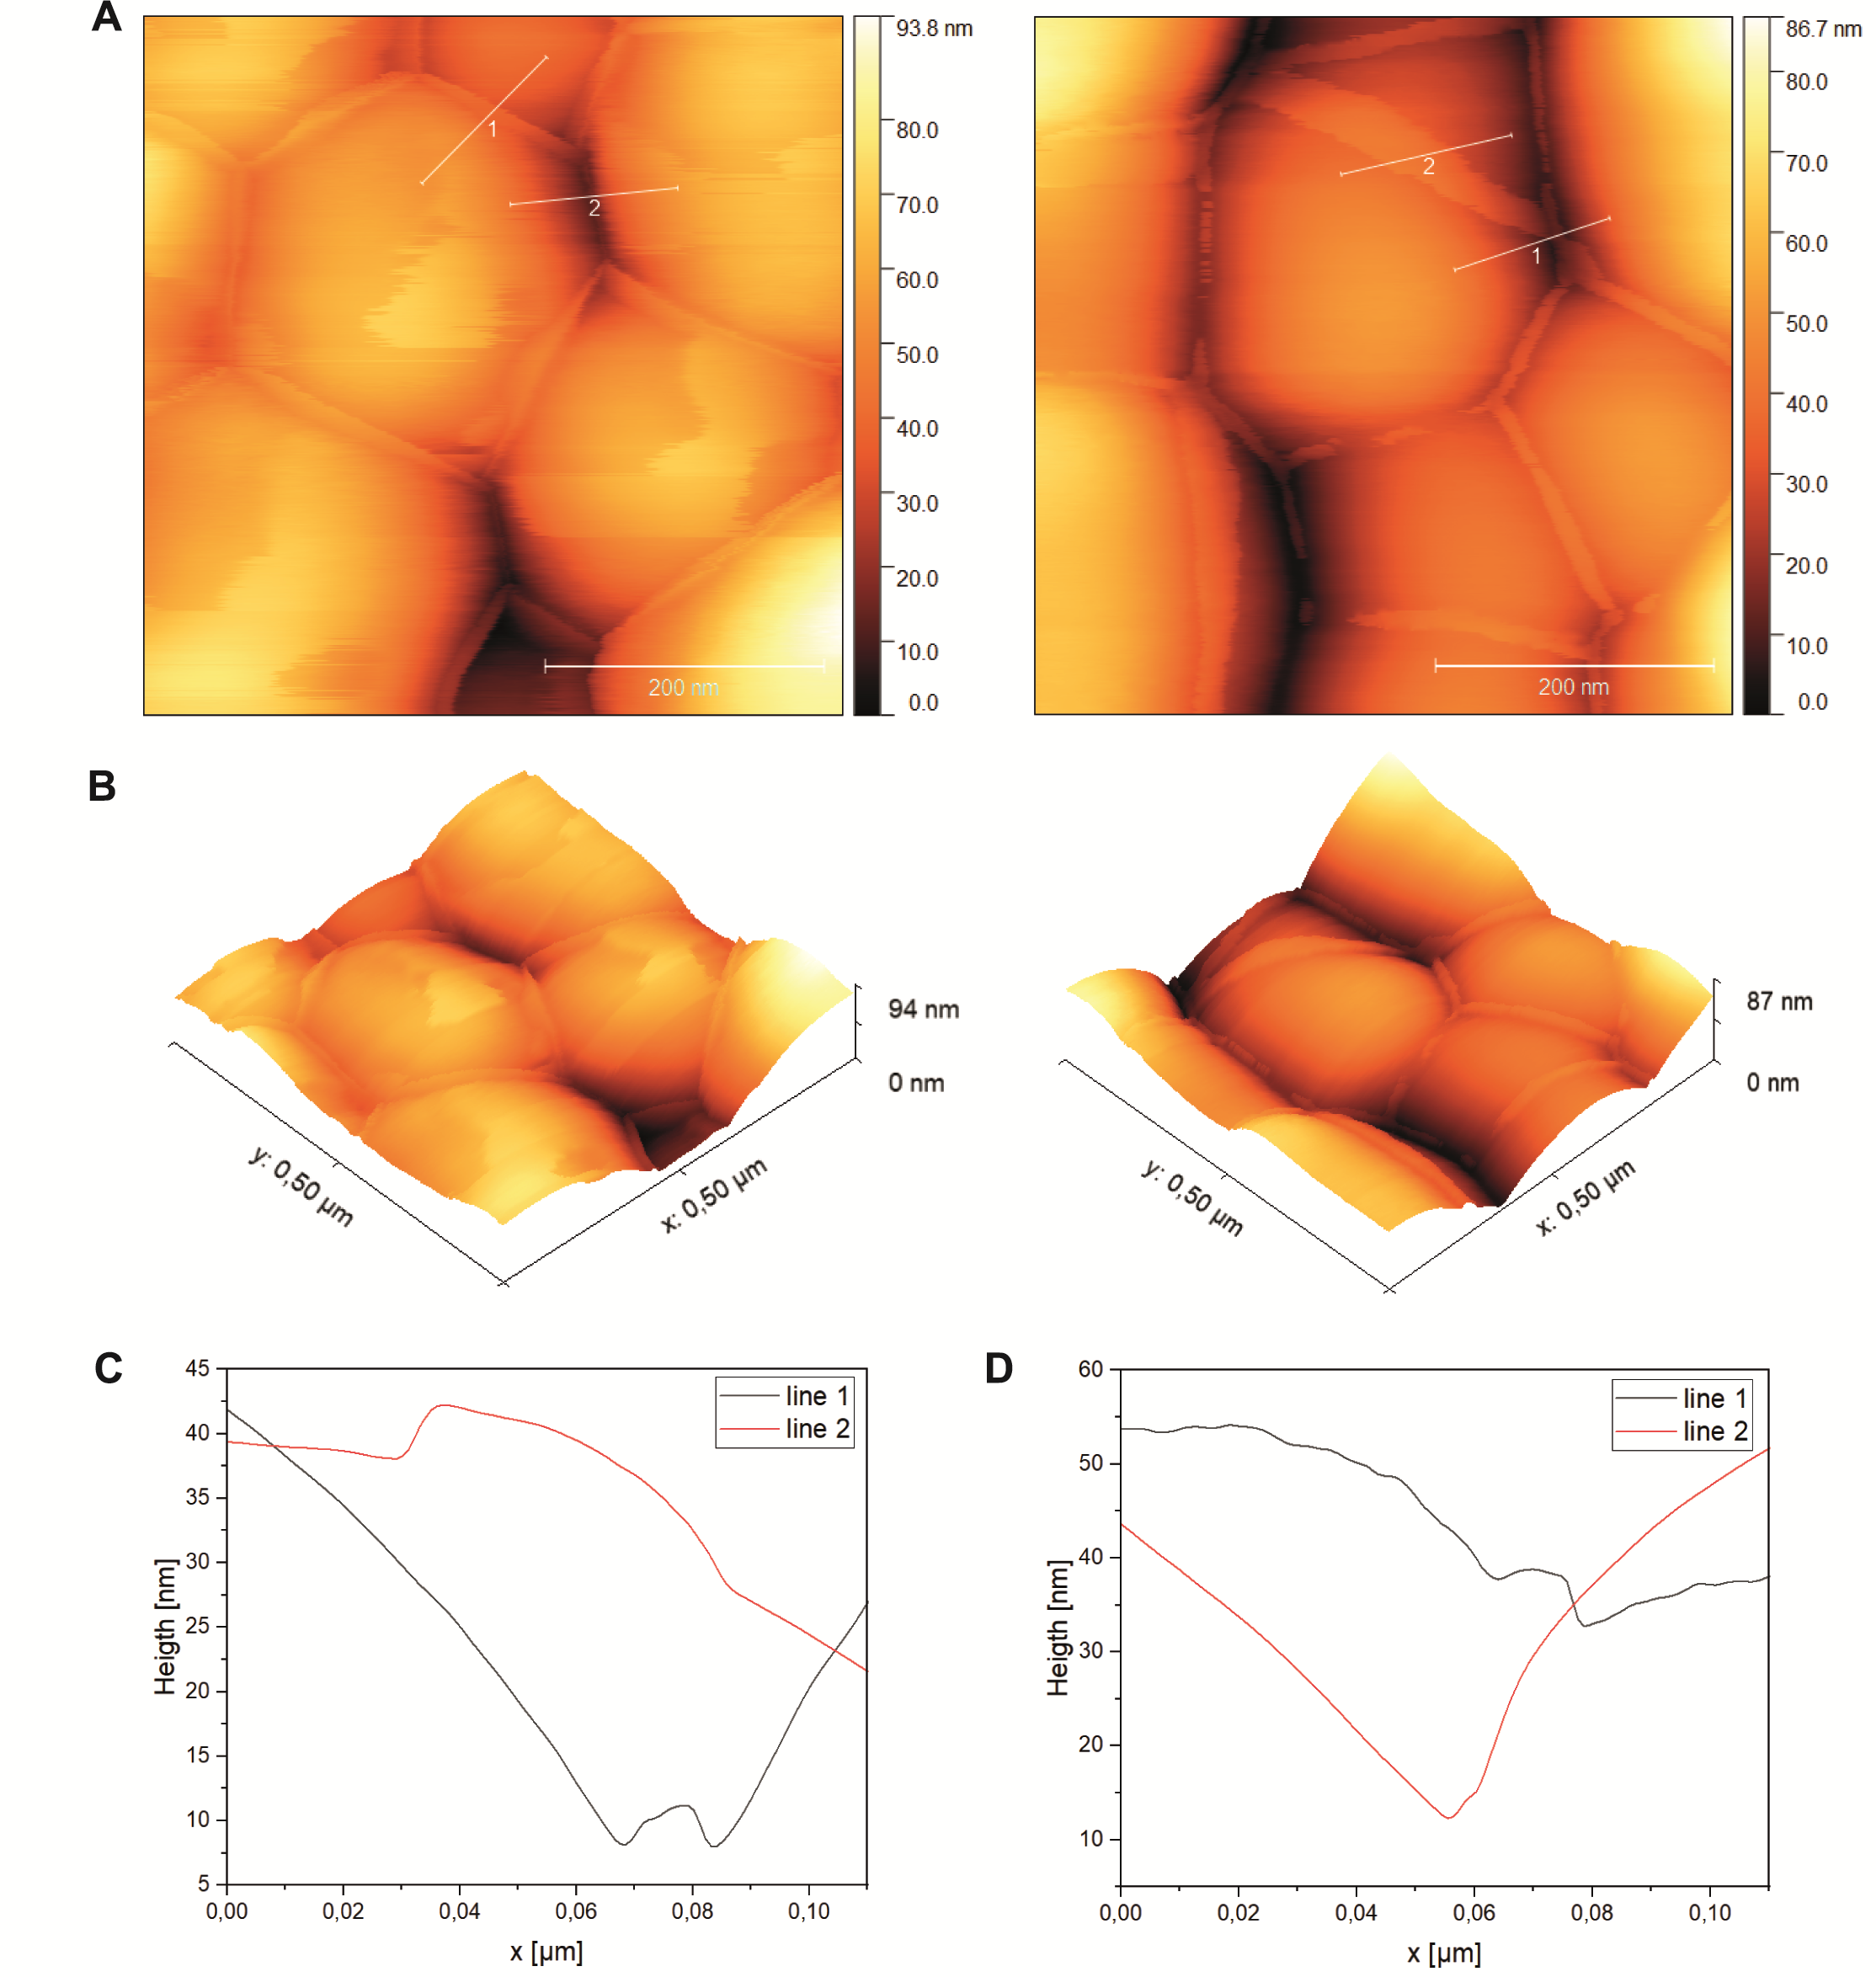

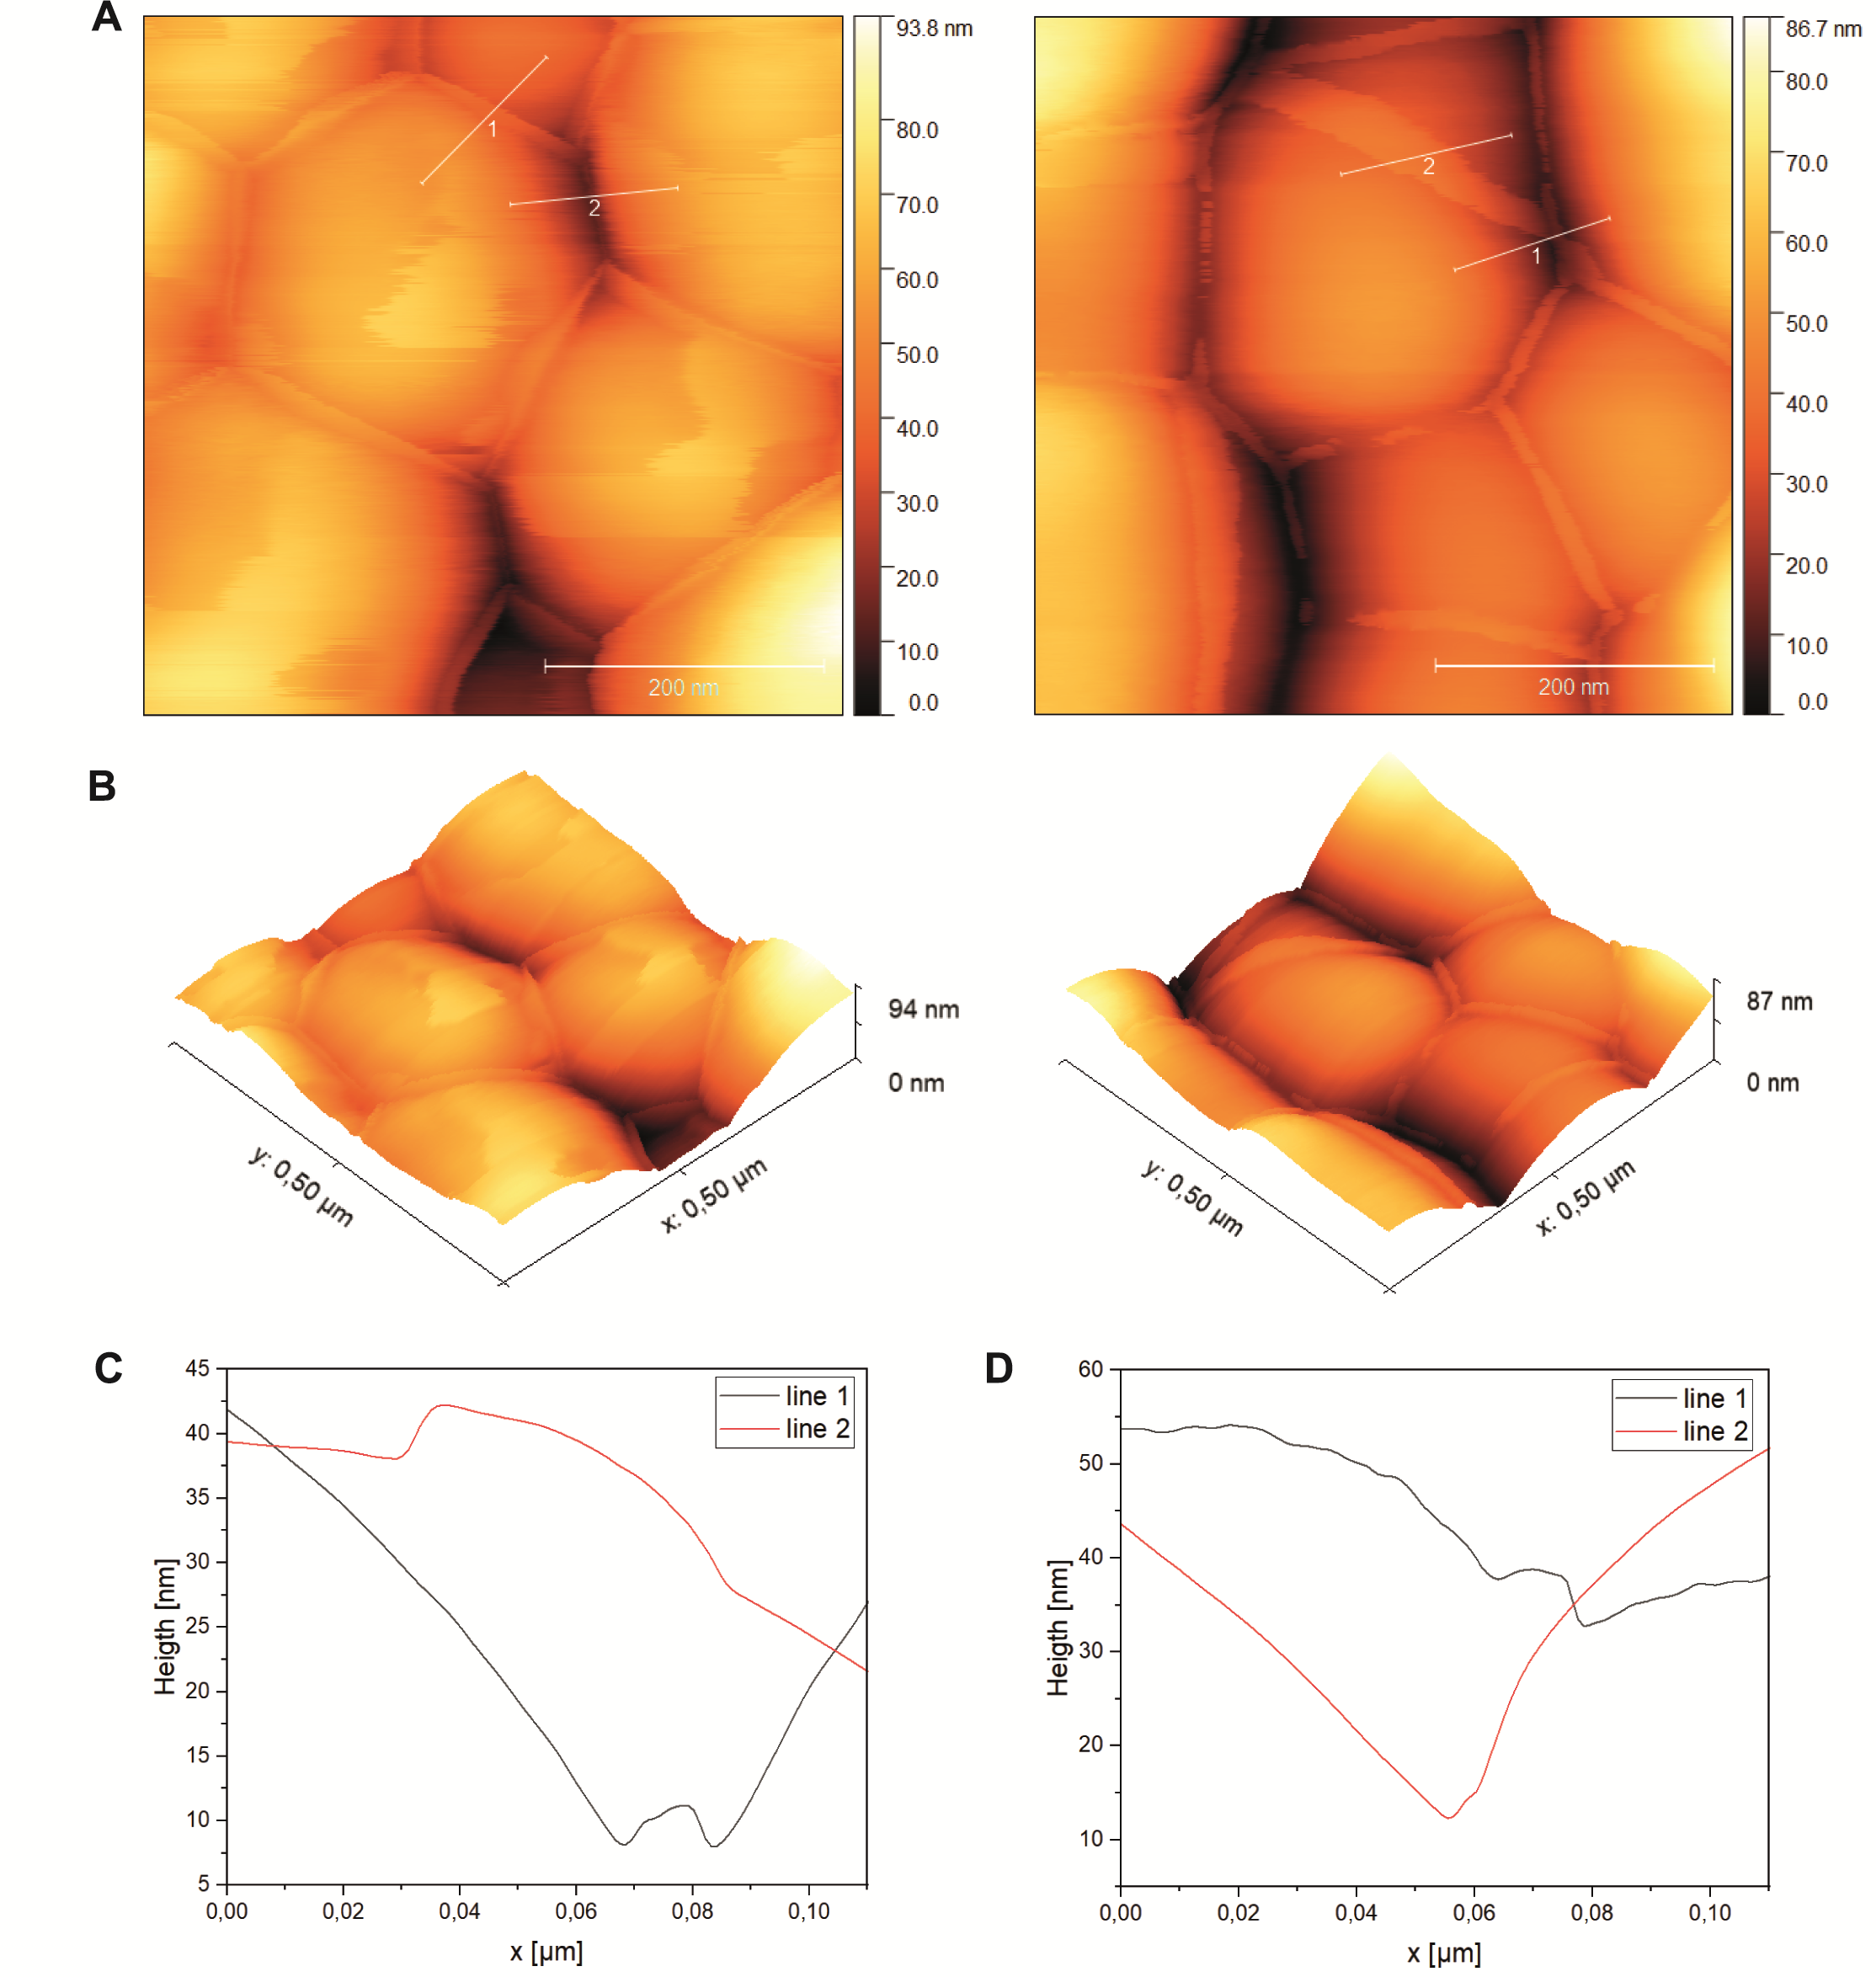


**A**

**C**

**D**

**E**

**F**

**B**

**Figure Supplementary 1. AFM images illustrating the morphology and capture efficiency of silica nanoparticles.** (A) Silica nanoparticles without EVs, showing a uniform surface and well-defined particle boundaries, and (B) Silica nanoparticles with captured EVs. (C) 3D AFM image of (A). (D) 3D AFM image of (B). (E) Surface roughness and structural variations of (A). (F) Surface roughness and structural variations of (B).
